# Supplementary material
Source: MDPI journal article supplement (https://www.mdpi.com/1424-8220/11/6/5561)
Supplement: s1 [file s1]

Correction

## Correction: Darwish, A. and Hassanien, A.E. Wearable and Implantable Wireless Sensor Network Solutions for Healthcare Monitoring. *Sensors* 2011, 11, 5561-5595

Ashraf Darwish <sup>1,\*</sup> and Aboul Ella Hassanien <sup>2</sup>

<sup>1</sup> Faculty of Science, Helwan University, Cairo, Egypt

<sup>2</sup> Faculty of Computers and Information, Cairo University, Cairo, Egypt; E-Mail: aboitcairo@gmail.com

\* Author to whom correspondence should be addressed; E-Mail: amodarwish@yahoo.com; Tel.: +20-105-645-222; Fax: +20-225-552-468.

Received: 10 September 2012 / Accepted: 11 September 2012 / Published: 12 September 2012

A reference is missing in our paper [1]. Figure 2 was adapted from Reference [2] with permission. The figure is listed and described as below:

**Figure 2.** A WSN system: (a) wired system and (b) wireless system. Adapted with permission from [2].

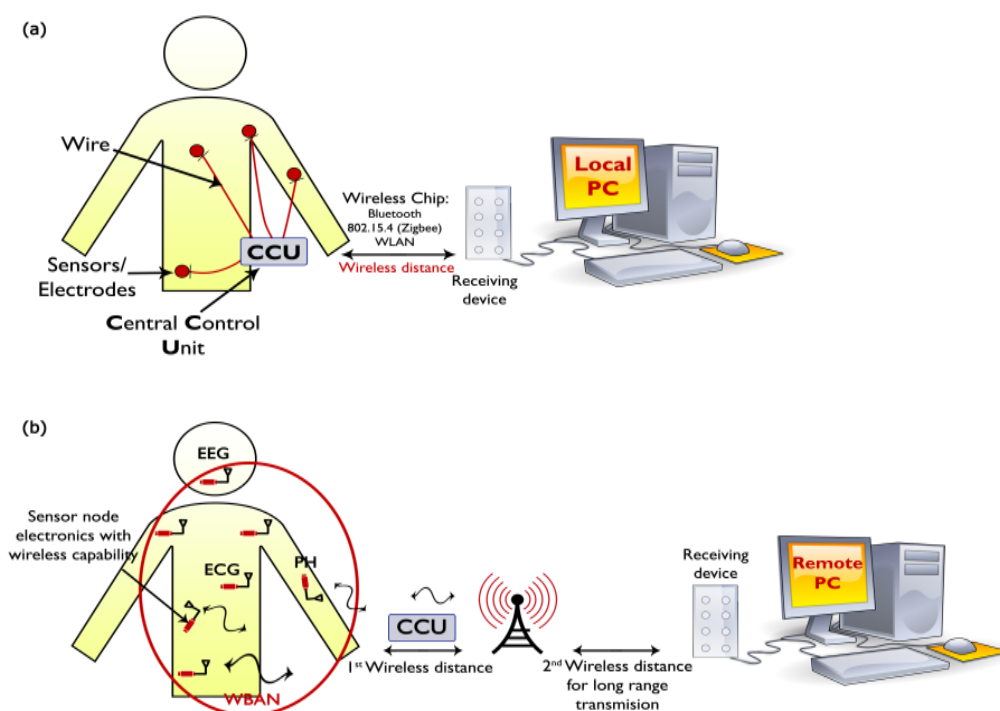

WBANs application in the medical field are composed of wearable and implantable sensors that can detect information from the human body and send it to a central unit as shown in Figure 2. These sensors have some characteristics such as small, low-power detection and have the capability to detect medical signals data from the control unit. There is a difficulty in the monitoring devices that are not completely wearable where the wires are used to connect many sensors. Yuce [2] explored a vision to the future of medical sensor networks should be miniaturized and also wearable sensors that can communicate with the receiving device wirelessly.

## References

1. Darwish, A.; Hassanien, A.E. Wearable and Implantable Wireless Sensor Network Solutions for Healthcare Monitoring. *Sensors* **2011**, *11*, 5561–5595.
2. Yuce, M.R. Implementation of Wireless Body Area Networks for Healthcare Systems. *Sens. Actuators A: Phys.* **2010**, *162*, 116–129.

© 2012 by the authors; licensee MDPI, Basel, Switzerland. This article is an open access article distributed under the terms and conditions of the Creative Commons Attribution license (<http://creativecommons.org/licenses/by/3.0/>).
